# Supplementary material for: Enzymatic synthesis of supported CdS quantum dot/reduced graphene oxide photocatalysts
Source: Royal Society of Chemistry journal article supplement (doi:10.1039/c9gc00097f), 2019-01-01
Supplement: c9gc00097f1.pdf [file c9gc00097f1.pdf]

## Supplemental Information

### Enzymatic Synthesis of Supported CdS Quantum Dot/Reduced Graphene Oxide Photocatalysts

Leah C. Spangler<sup>1</sup>, Joseph.P. Cline<sup>2</sup>, John D. Sakizadeh<sup>1</sup>, Christopher J. Kiely<sup>1,2</sup>, Steven McIntosh\*<sup>1</sup>

<sup>1</sup> Department of Chemical and Biomolecular Engineering, Lehigh University, Bethlehem, PA 18015, USA.

<sup>2</sup> Department of Materials Science and Engineering, Lehigh University, Bethlehem, PA 18015, USA.

\*mcintosh@lehigh.edu

#### Table of Contents

**Figure S1.** UV-vis absorption of GO incubated with PLL and CSE in the absence of L-cysteine, showing no reduction.

**Figure S2.** Annotated atomic resolution HAADF-STEM images of the particles shown in a) Figure 3b) and b) Figure 3c) that match both the CdS wurtzite or zincblende-type structures.

**Table S1.** Lattice matching parameters for particles shown in Figure S2a) showing matching that is consistent with both the wurtzite or zincblende type-structures of CdS.

**Table S2.** Lattice matching parameters for particles shown in Figure S2b) showing matching that is consistent with both the wurtzite or zincblende type-structures of CdS.

**Figure S3.** Annotated atomic resolution HAADF-STEM images of the particles shown in a) Figure 3e matching the CdS wurtzite structure, and b) Figure 3f) matching the CdS zincblende-type structure.

**Table S3.** Lattice matching parameters for particles shown in Figure S3 demonstrating the presence of both wurtzite and zincblende-type structured particles.

**Figure S4.** TCSPC of CdS and CdS/rGO. The fits are shown as dotted lines.

**Table S3.** Fitted fluorescence lifetime parameters from TCSPC results shown in Figure S4.

**Figure S5.** UV-vis absorbance spectra before and after photoreaction for a) CdS QDs and b) CdS/rGO.

**Figure S6.** Hydrogen production verses time for CdS QD catalyst showing a decrease in rate after the initial 1-2 hours. The line is provided to emphasize the decline in rate over time.

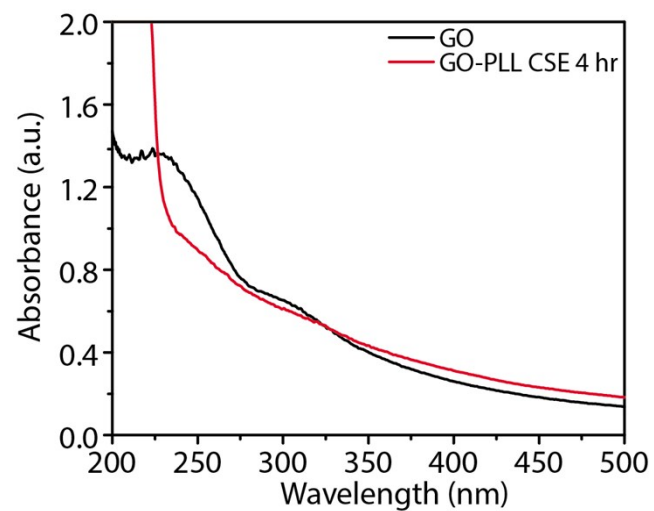

**Figure S1.** UV-Vis absorption of GO incubated with PLL and CSE in the absence of L-cysteine, showing no reduction.

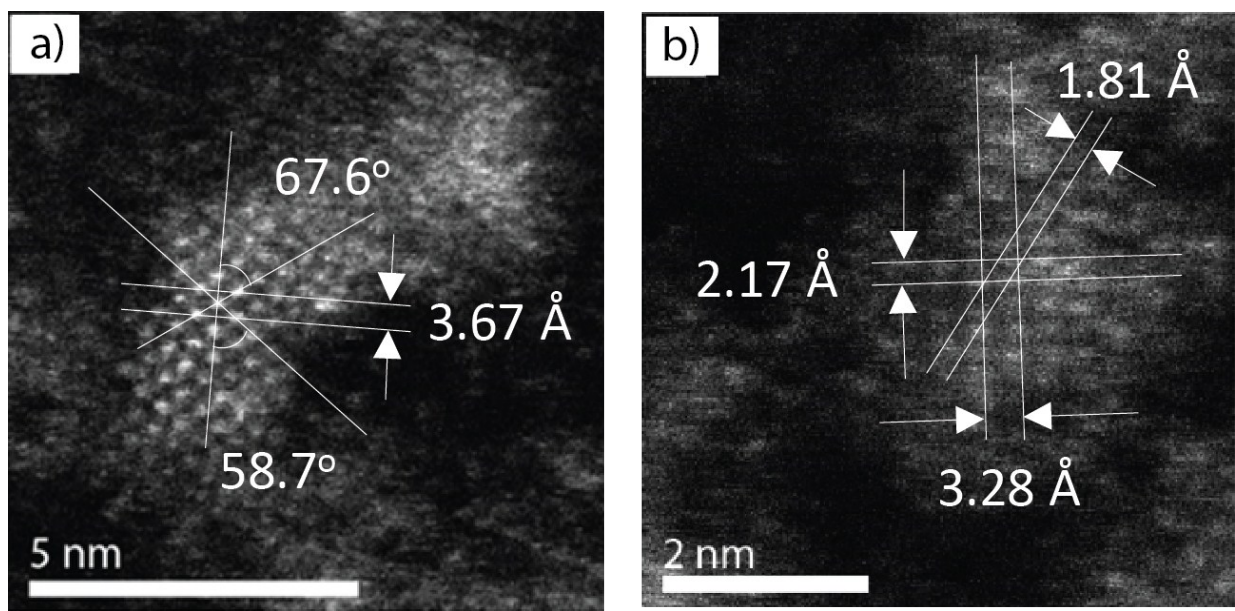

**Figure S2.** Annotated atomic resolution HAADF-STEM images of the particles shown in a) Figure 3b) and b) Figure 3c) that match both the CdS wurtzite or zincblende-type structures.

**Table S1.** Lattice matching parameters for particles shown in Figure S2a) showing matching that is consistent with both the wurtzite or zincblende type structures of CdS.

| Nanocrystal Identification as either Wurtzite or Zincblende CdS in Figure S2a) |          |          |        |                             |          |          |        |
|--------------------------------------------------------------------------------|----------|----------|--------|-----------------------------|----------|----------|--------|
| Wurtzite [101] projection                                                      |          |          |        | Zincblende [110] projection |          |          |        |
|                                                                                | Measured | Matching | Error  |                             | Measured | Matching | Error  |
| (0-10)                                                                         | d=3.67 Å | 3.64 Å   | 0.37%  | ( $\bar{1}11$ )             | d=3.67 Å | 3.42 Å   | 6.82%  |
| (-101)                                                                         | d=3.12 Å | 3.22 Å   | -2.86% | (002)                       | d=3.12 Å | 2.97 Å   | 5.19%  |
| (-212)                                                                         | d=1.77 Å | 1.79 Å   | -1.56% | (Error!<br>20)              | d=2.17 Å | 2.10 Å   | 3.33%  |
| <1,2>                                                                          | 67.6°    | 63.8°    | 5.96%  | ( $\bar{1}1$ Err<br>or!)    | d=1.77 Å | 1.79 Å   | -1.56% |
| <1,3>                                                                          | 93.4°    | 90°      | 3.76%  | <1,2>                       | 58.7°    | 54.4°    | 7.33%  |
| -                                                                              | -        | -        | -      | <1,3>                       | 32.7°    | 35.3°    | -7.26% |
| -                                                                              | -        | -        | -      | <1,4>                       | 104.5°   | 100°     | 4.5%   |

**Table S2.** Lattice matching parameters for particles shown in Figure S2b) showing matching that is consistent with both the wurtzite or zincblende-type structures of CdS.

| <b>Nanocrystal Identification as either Wurtzite or Zincblende CdS in Figure S2b)</b> |             |          |        |                             |             |          |        |
|---------------------------------------------------------------------------------------|-------------|----------|--------|-----------------------------|-------------|----------|--------|
| Wurtzite [210] Projection                                                             |             |          |        | Zincblende [211] Projection |             |          |        |
|                                                                                       | Measurement | Matching | Error  |                             | Measurement | Matching | Error  |
| (002)                                                                                 | d=3.28 Å    | 3.42 Å   | -4.33% | ( $\bar{1}11$ )             | d=3.28 Å    | 3.42 Å   | -4.33% |
| (1-20)                                                                                | d=2.17 Å    | 2.11 Å   | 2.90%  | (0Error<br>!2)              | d=2.17 Å    | 2.10 Å   | 3.12%  |
| (1-22)                                                                                | d=1.81 Å    | 1.79 Å   | 0.85%  | (11Err<br>or!)              | d=1.81 Å    | 1.79 Å   | 0.85%  |
| <1,2>                                                                                 | 90°         | 90°      | -      | <1,2>                       | 90°         | 90°      | -      |
| <1,3>                                                                                 | 56.3°       | 58.42°   | 3.61%  | <1,3>                       | 56.3°       | 58.5°    | -3.78% |

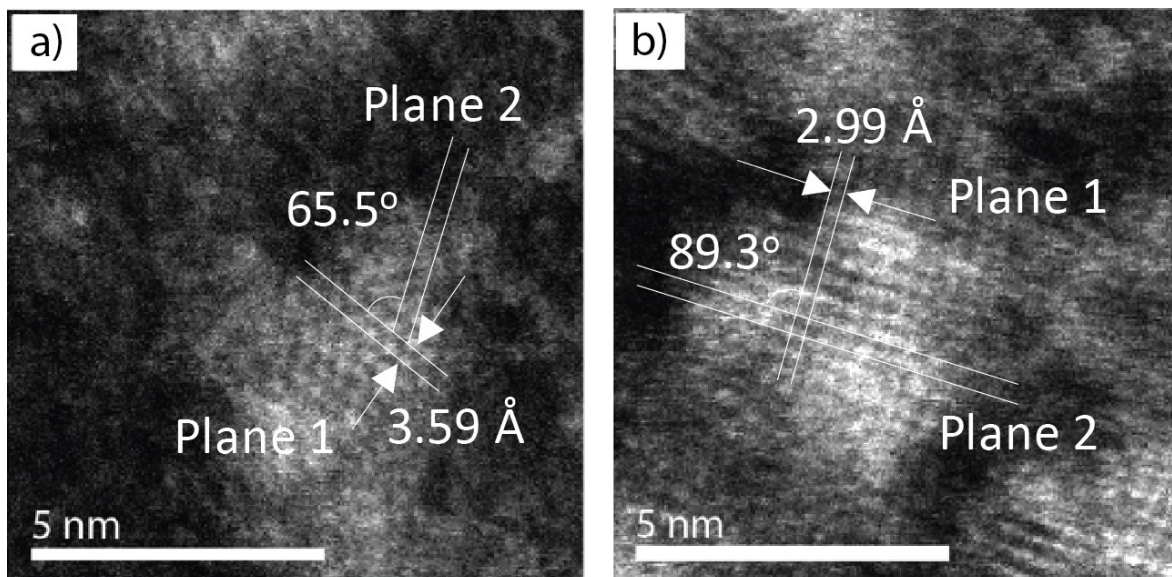

**Figure S3.** Annotated atomic resolution HAADF-STEM images of the particles shown in a) Figure 3e matching the CdS wurtzite structure, and b) Figure 3f) matching the CdS zincblende structure.

**Table S3.** Lattice matching parameters for particles shown in Figure S3 demonstrating the presence of both wurtzite and zincblende structured particles.

| <b>Nanocrystal Identification as Wurtzite CdS and Zincblende CdS in Figures S3a) and S3b)</b> |             |                        |                                          |             |              |
|-----------------------------------------------------------------------------------------------|-------------|------------------------|------------------------------------------|-------------|--------------|
| Figure S3a): Wurtzite [101] projection                                                        |             |                        | Figure S3b): Zincblende [001] projection |             |              |
|                                                                                               | Measurement | Matching               |                                          | Measurement | Matching     |
| (-101)                                                                                        | d=3.59 Å    | 3.64 Å ( $0\bar{1}0$ ) | (200)                                    | d=2.99 Å    | 2.97 Å (200) |
| (-101)                                                                                        | d=3.24 Å    | 3.22 Å ( $\bar{1}01$ ) | (020)                                    | d=3.07 Å    | 2.97 Å (020) |
| <1,2>                                                                                         | 65.5°       | 63.8°                  | <1, 2>                                   | 89.3°       | 90°          |

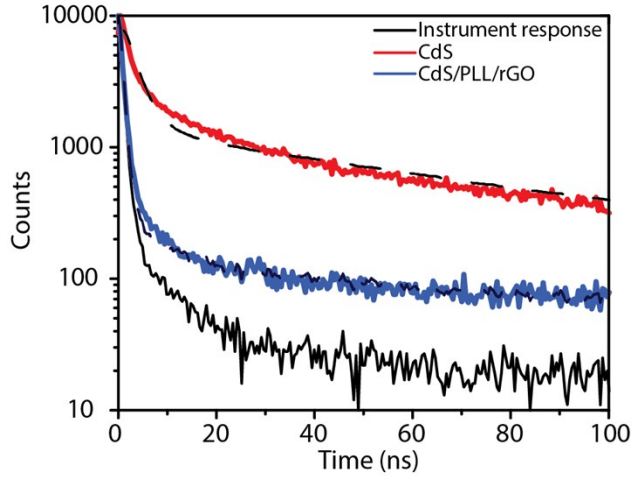

**Figure S4.** TCSPC of CdS and CdS/rGO. The bi-exponential fits are shown as dotted lines.

**Table S3.** Fitted fluorescence lifetime parameters from TCSPC results shown in Figure S4.  $A_1$  and  $A_2$  correspond to relative amplitudes.  $t_1$  and  $t_2$  correspond to lifetime.

$$F(t) = C + A_1 e^{-t/\tau_1} + A_2 e^{-t/\tau_2}$$

|         | $A_1$ | $t_1$ (ns) | $A_2$ | $t_2$ (ns) |
|---------|-------|------------|-------|------------|
| CdS     | 0.30  | 2.5        | 0.70  | 65         |
| CdS/rGO | 0.94  | 0.2        | 0.06  | 68         |

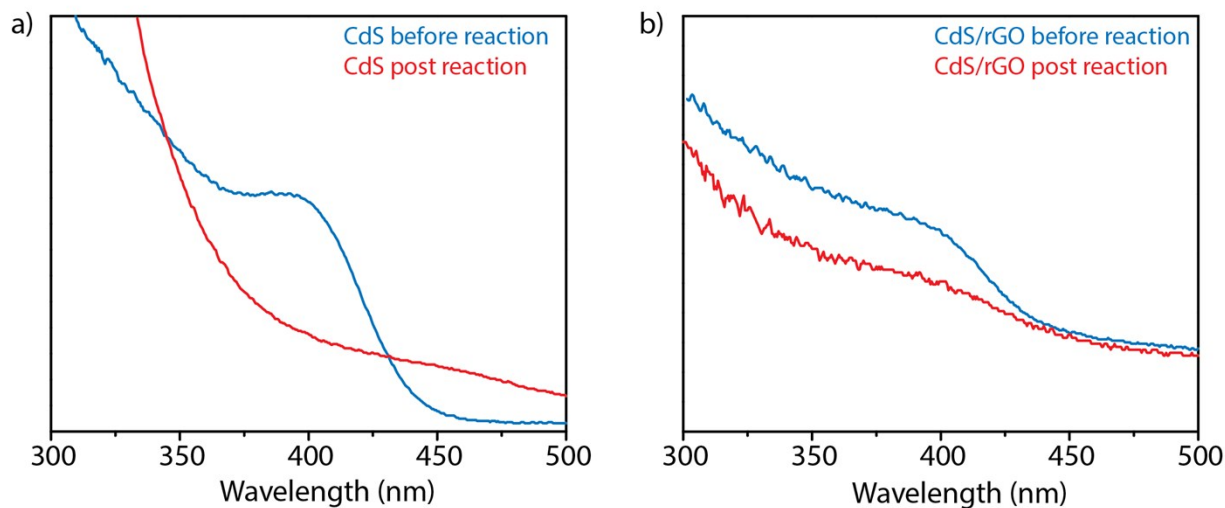

**Figure S5.** UV-vis absorbance spectra before and after photoreaction for a) CdS QDs and b) CdS/rGO. The absence of a post reaction peak in a) is due to agglomeration and precipitation of CdS which then falls out of solution.

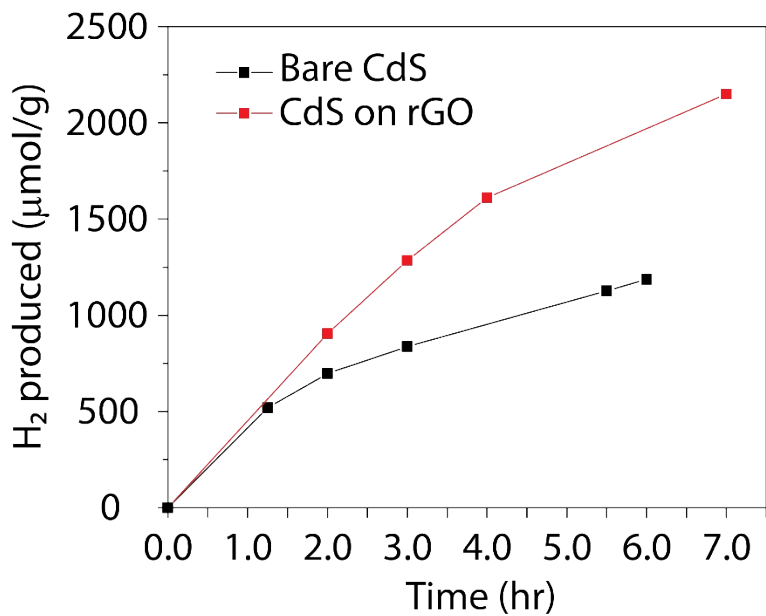

**Figure S6.** Hydrogen production versus time for both the optimized CdS/rGO and bare CdS nanocrystal catalyst. The bare CdS nanocrystal catalyst shows a decrease in hydrogen production after the initial two hours, while the rGO/CdS catalyst remains consistent. The connecting lines are provided to emphasize the change in hydrogen generation rate at each time point.
